# Supplementary material
Source: PubMed Central journal article supplement (PMC3941206)

MMTV-PyMT in 3D Culture

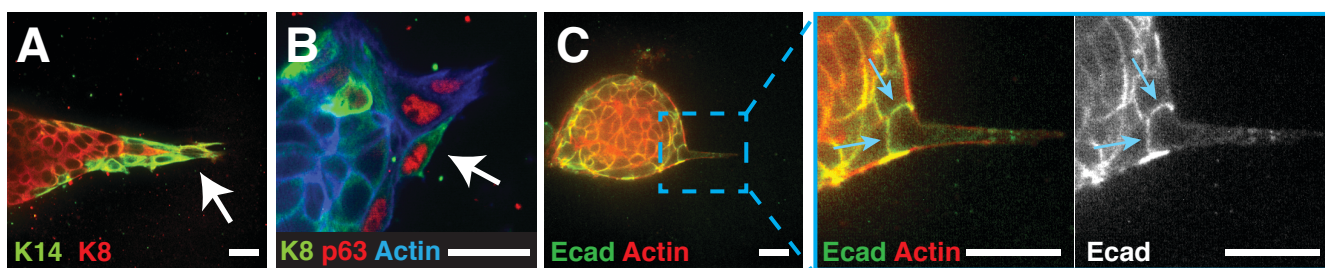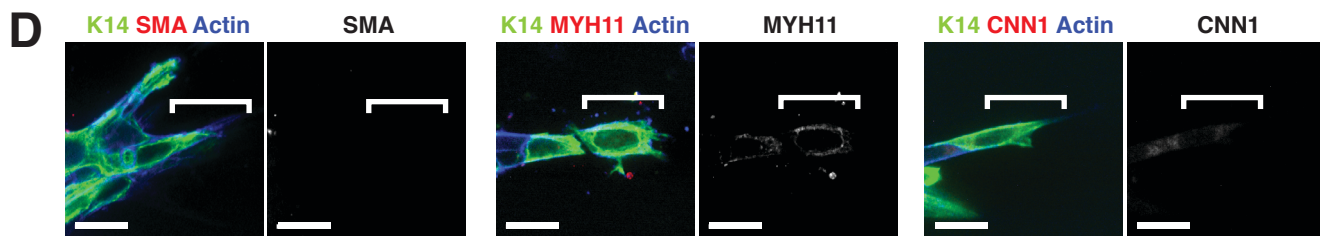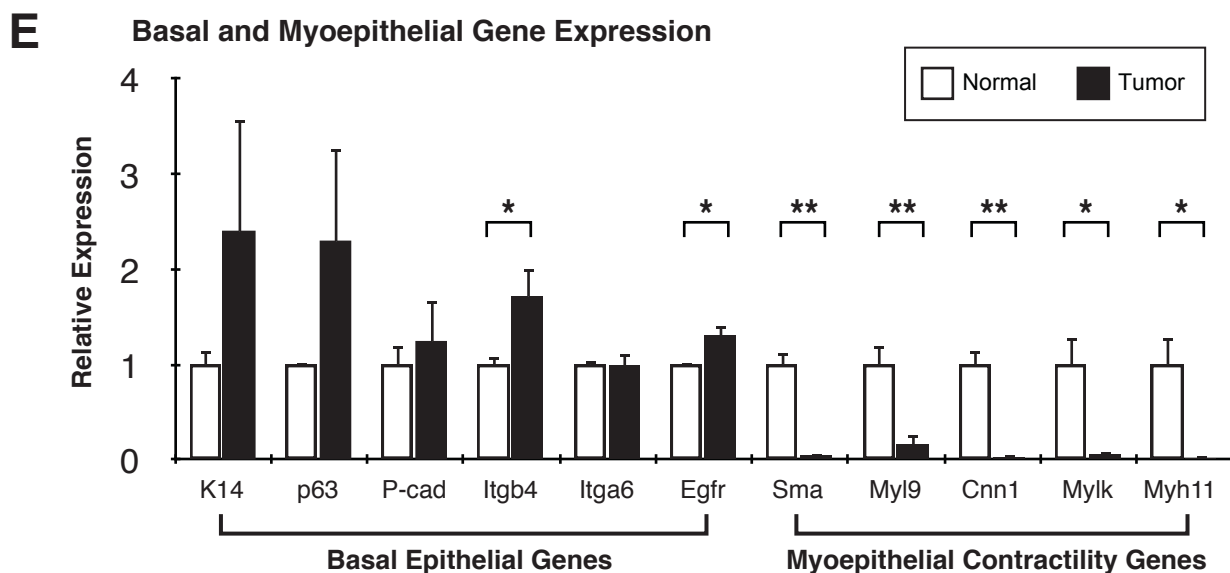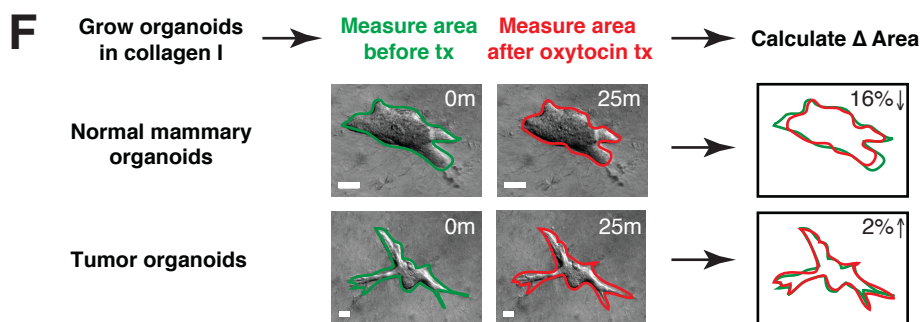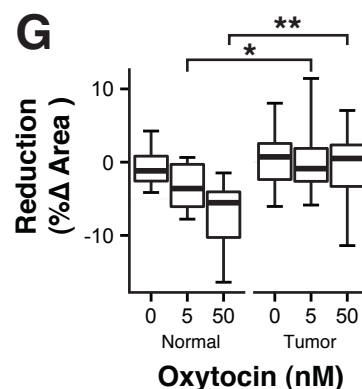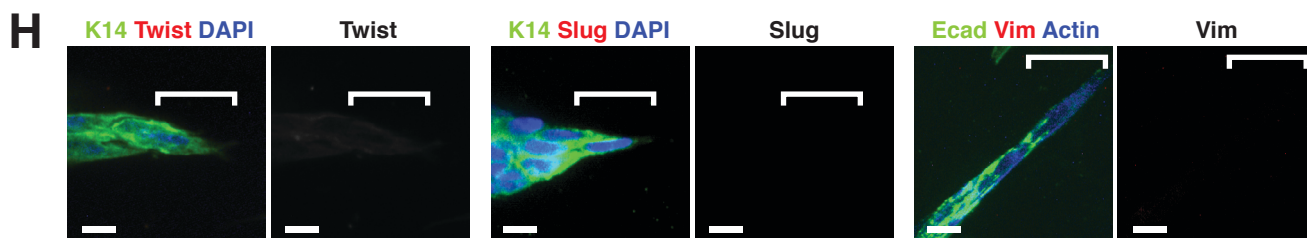

MMTV-PyMT In Vivo

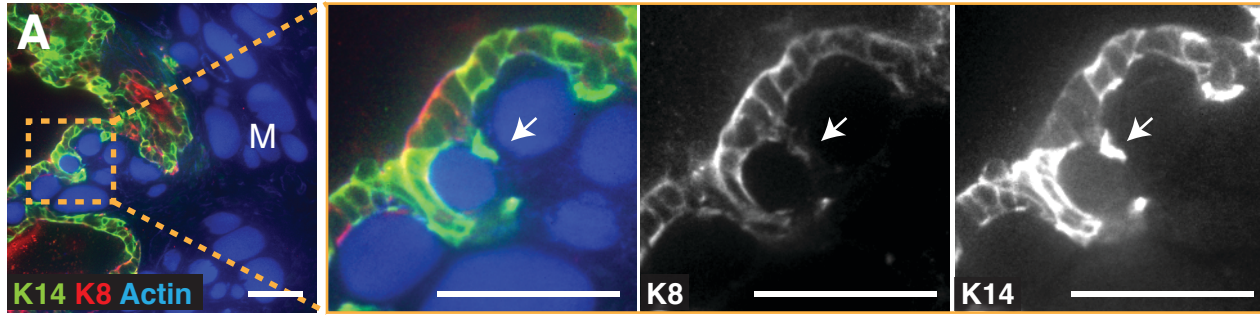

**Lung Metastases**

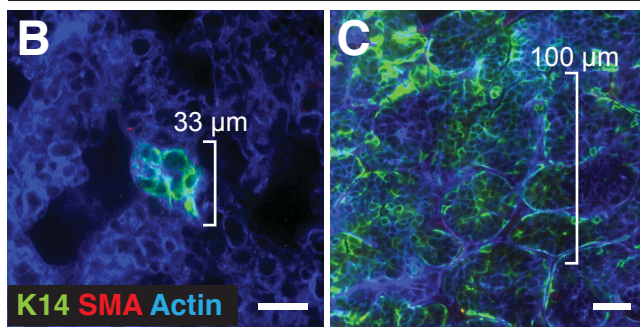

**Primary Tumor Cells**

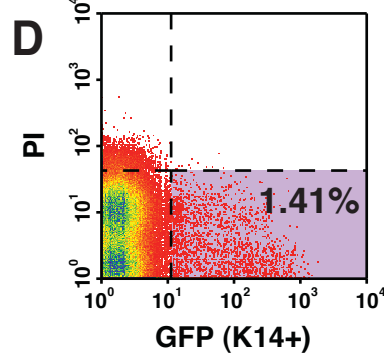

**E** mTomato+ tumor organoids

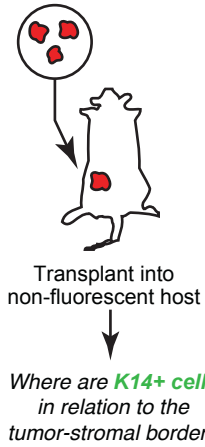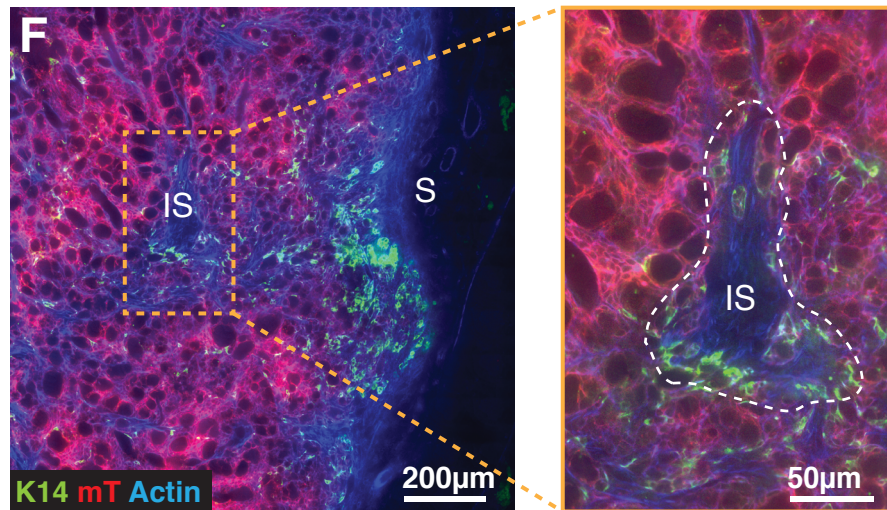

**G**

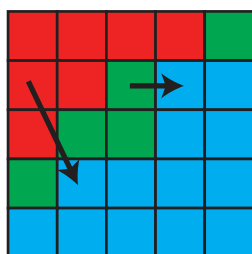

K14+ cell  
K14- cell  
Stroma

What is the relative distance of K14+ cells from the tumor-stroma border?

$$d_{ij} = \min(\text{Euclidean distance}(r_{ij}, d_{ij})) \text{ s.t. } r_{ij} = \text{stroma}$$

**H**

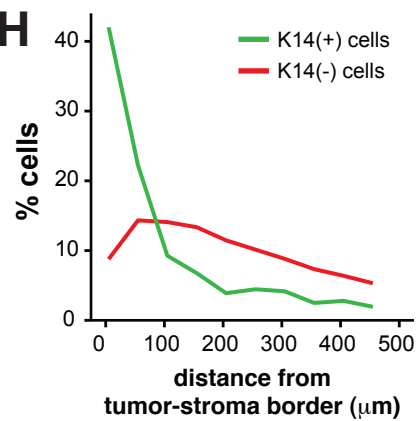

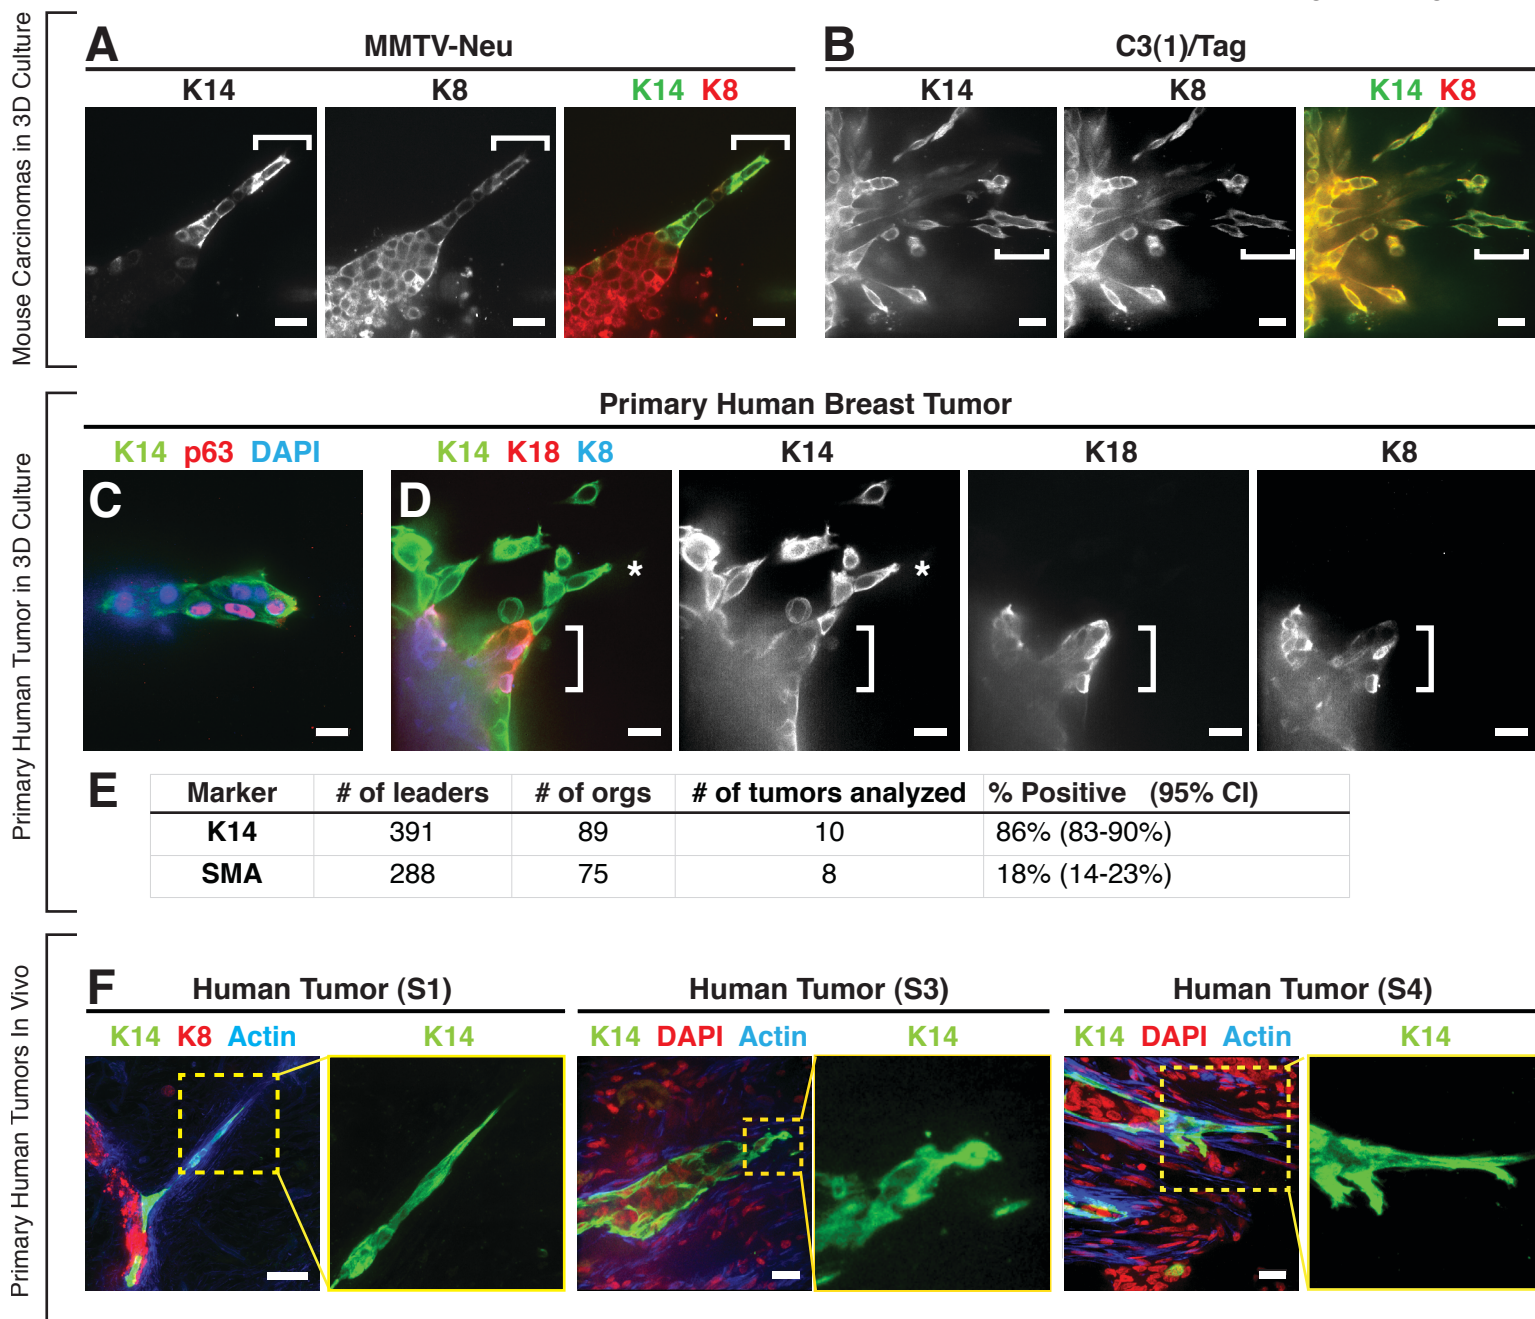

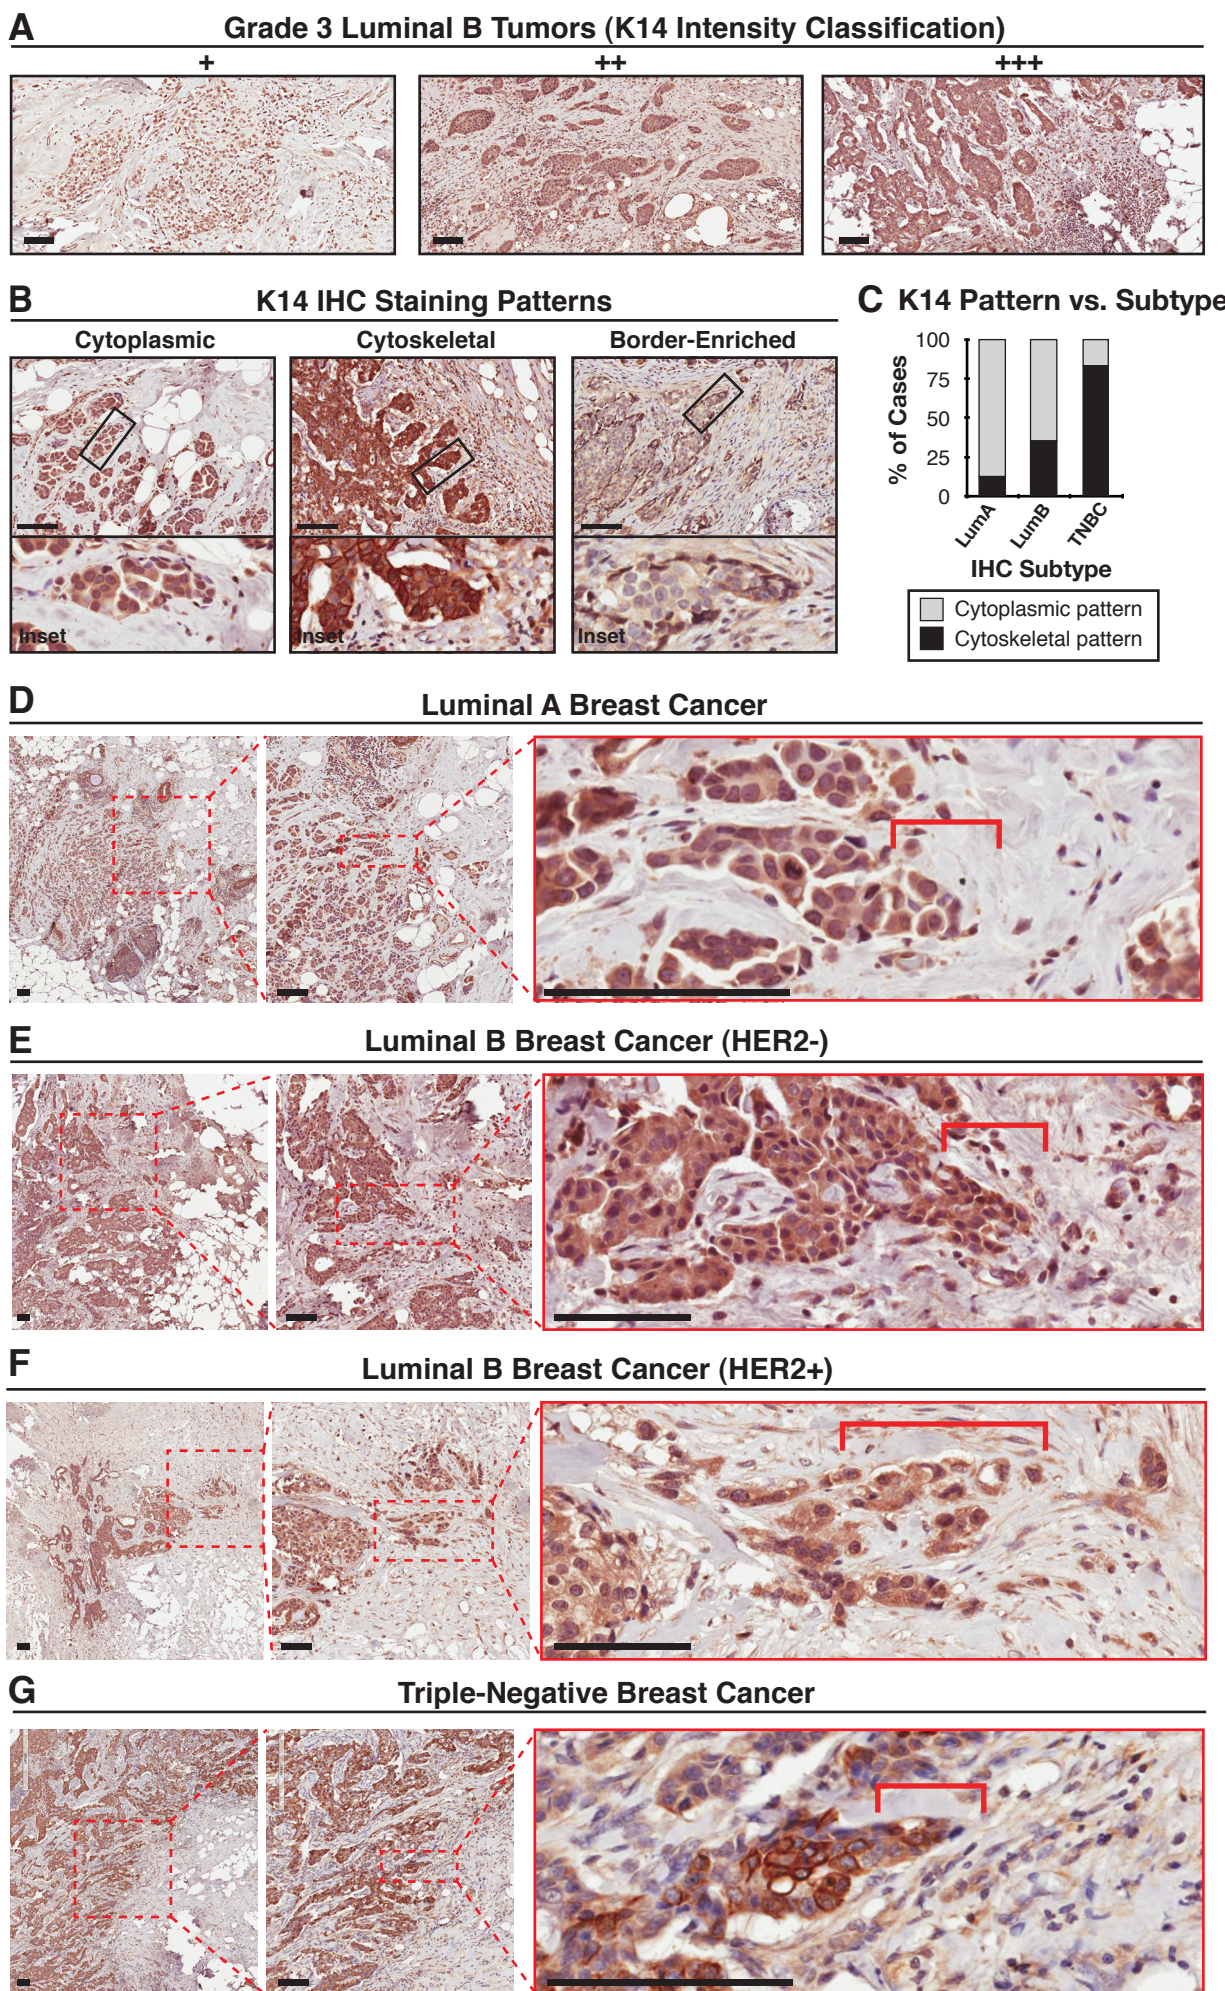

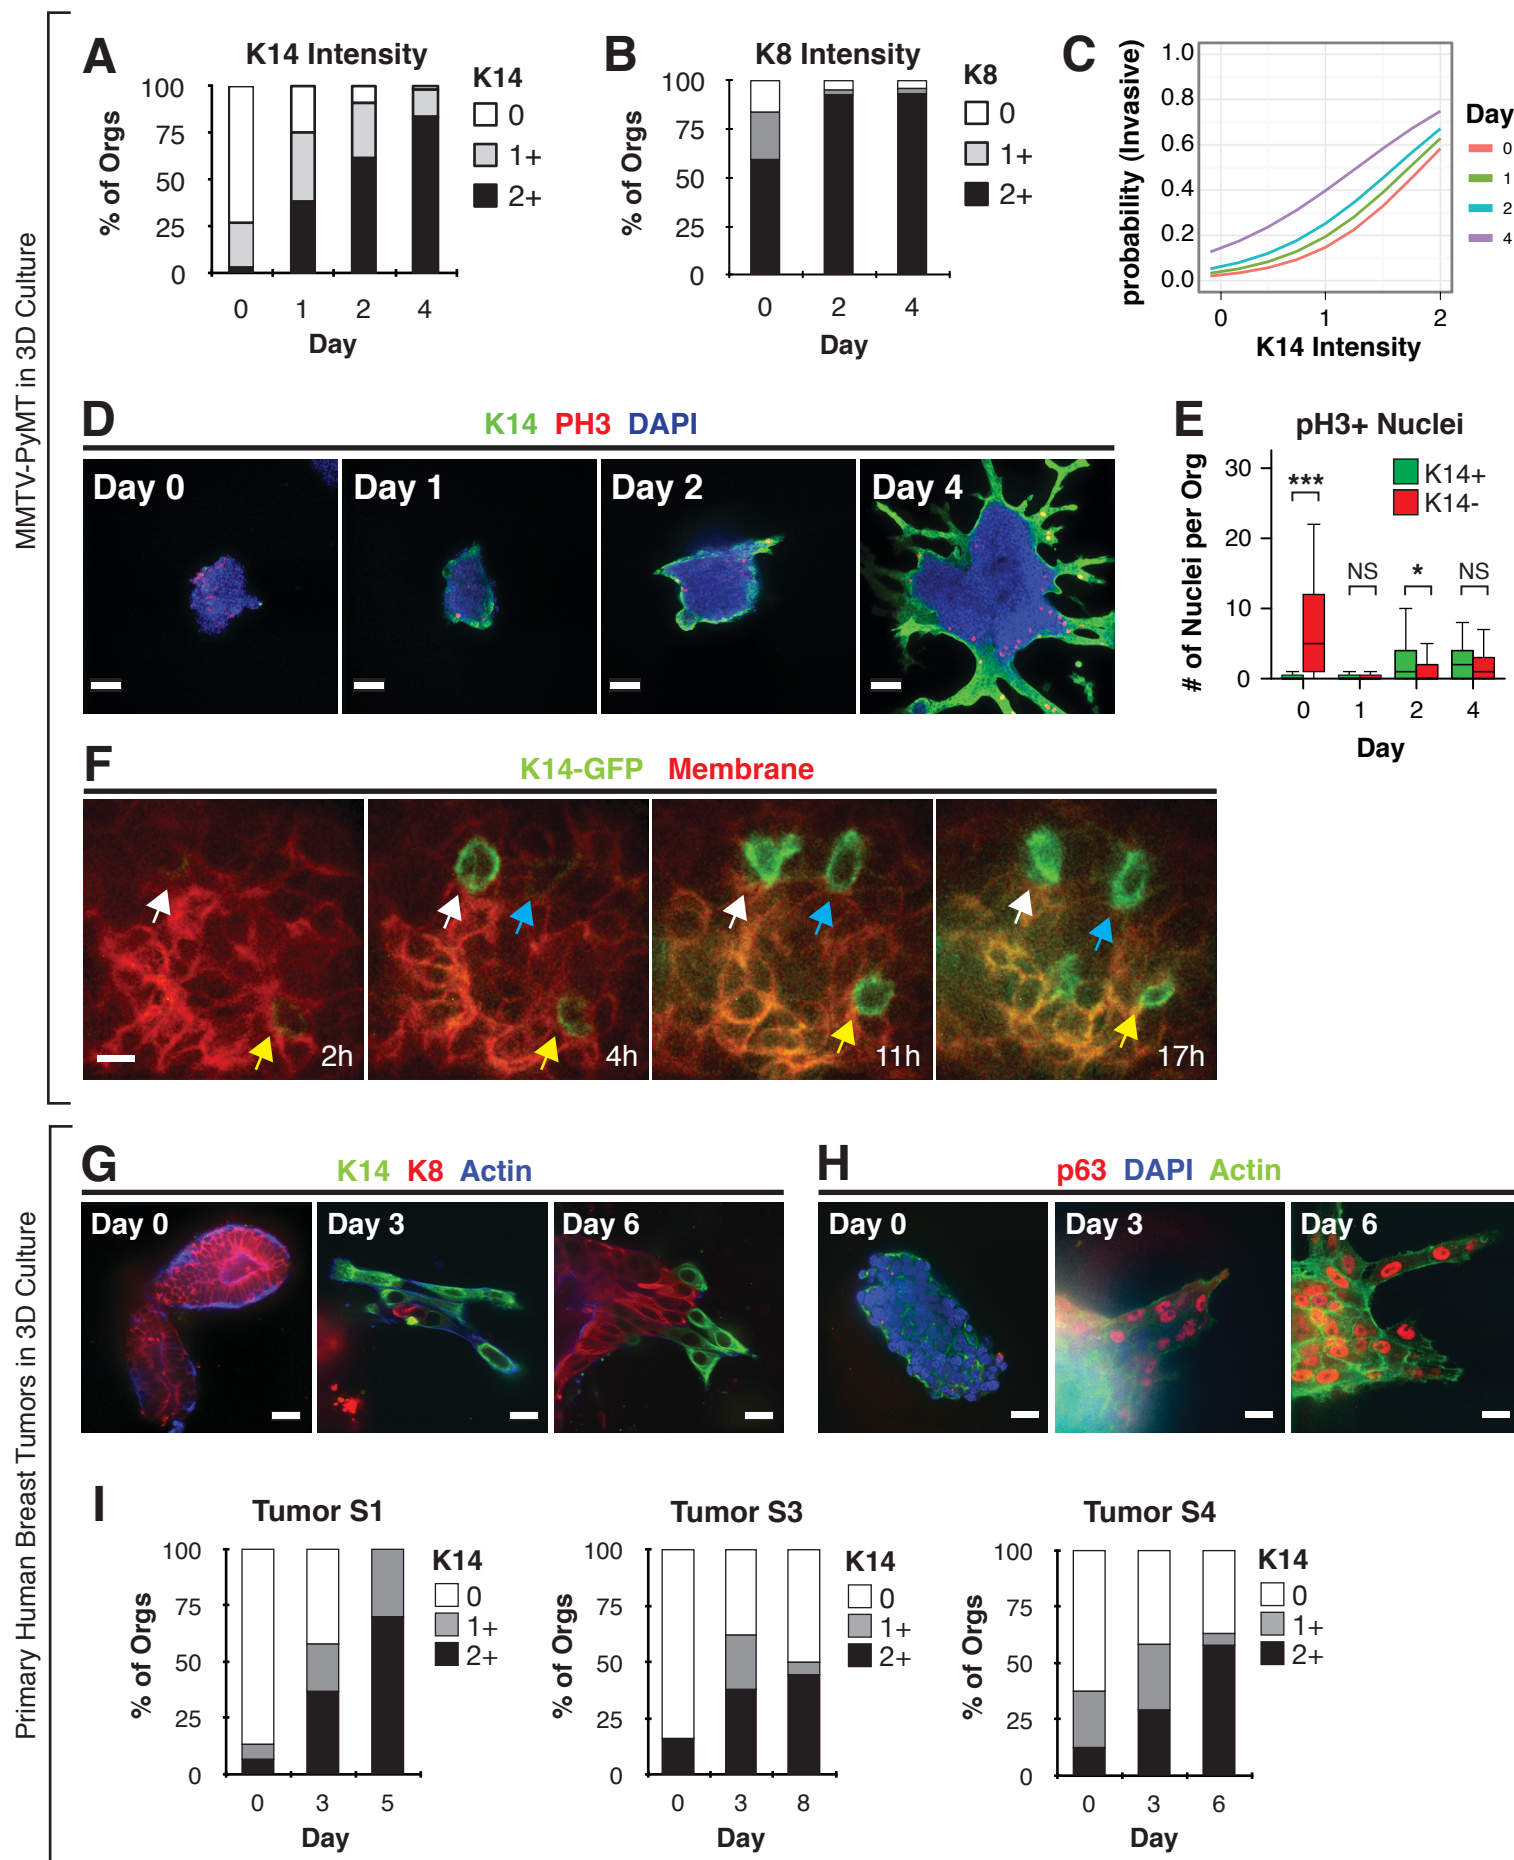

MMTV-PyMT in 3D Culture

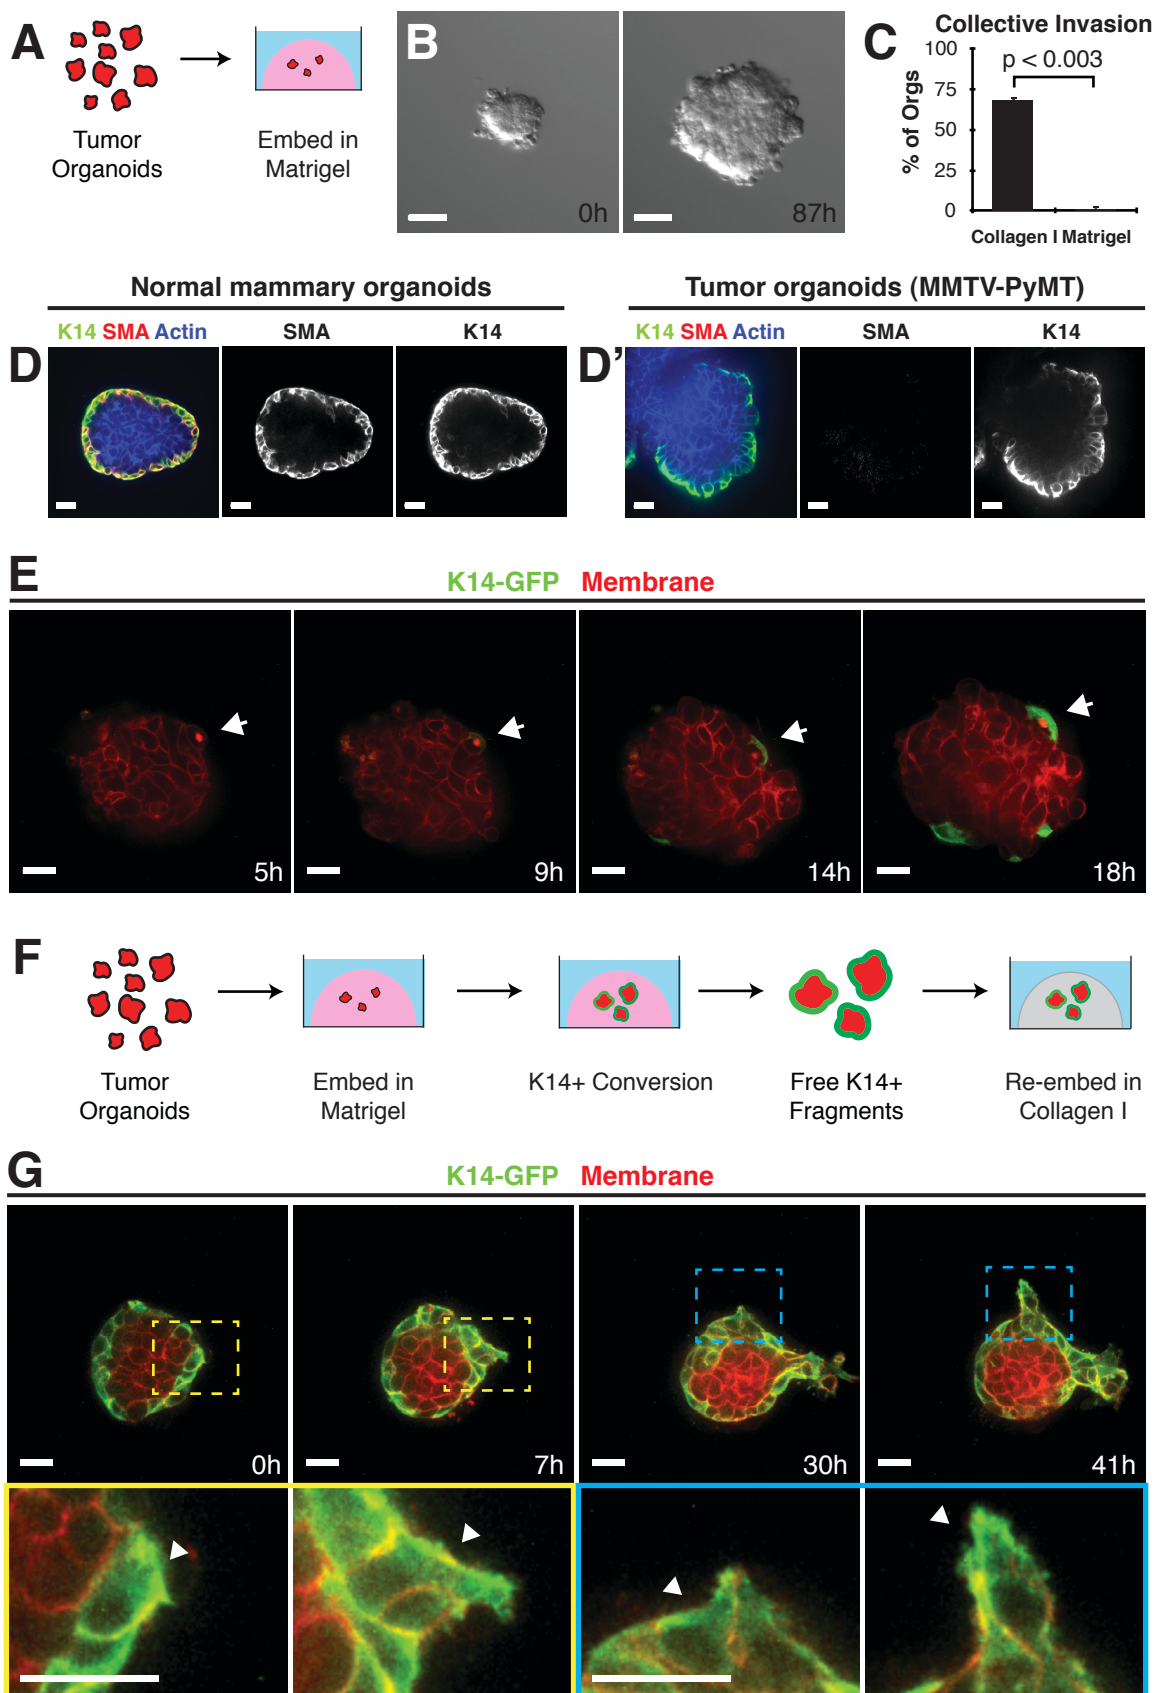

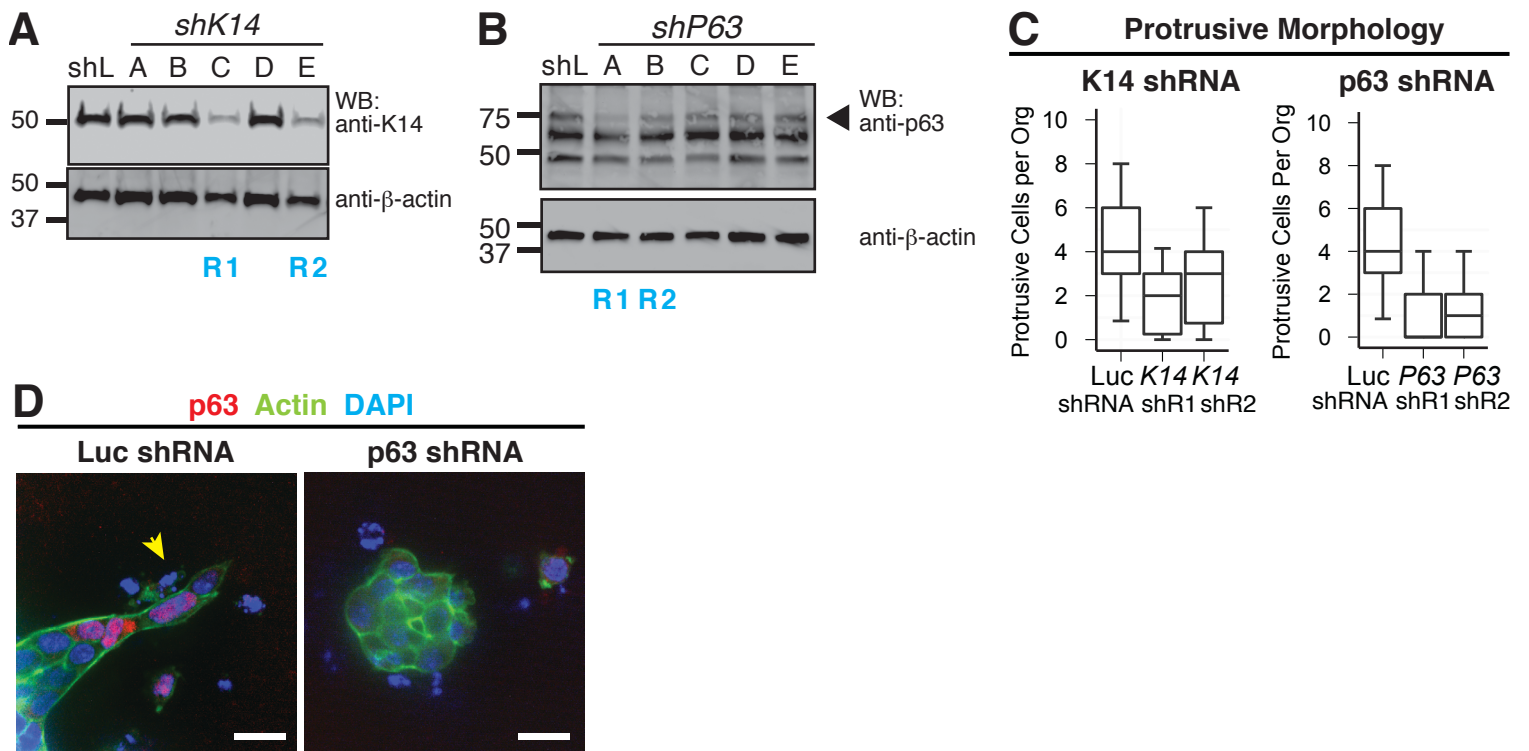

Supplement: NIHMS545070-supplement-02.pdf [file NIHMS545070-supplement-02.pdf]
